# Supplementary material for: Measurement Model of Healthy and Sustainable Cities: The Perception Regarding the Sustainable Development Goals
Source: MDPI journal article supplement (doi:10.3390/su152015004), 2023-10-18
Supplement: s1 [file s1]

| Considering the characteristics of a sustainable and healthy city, indicate your perception of each of the characteristics below and mark the most appropriate option. |                                                                | Very relevant | Relevant | Indifferent | Irrelevant | Very Irrelevant |
|------------------------------------------------------------------------------------------------------------------------------------------------------------------------|----------------------------------------------------------------|---------------|----------|-------------|------------|-----------------|
| Indicator                                                                                                                                                              | Social Indicator                                               |               |          |             |            |                 |
| Sub-indicator                                                                                                                                                          | Access to farmers' market                                      |               |          |             |            |                 |
| Sub-indicator                                                                                                                                                          | Access to high-quality education                               |               |          |             |            |                 |
| Sub-indicator                                                                                                                                                          | Access to housing                                              |               |          |             |            |                 |
| Sub-indicator                                                                                                                                                          | Informal settlement area                                       |               |          |             |            |                 |
| Sub-indicator                                                                                                                                                          | Defending against the impact of natural and man-made disasters |               |          |             |            |                 |
| Sub-indicator                                                                                                                                                          | Population density                                             |               |          |             |            |                 |
| Sub-indicator                                                                                                                                                          | Social Equity                                                  |               |          |             |            |                 |
| Sub-indicator                                                                                                                                                          | Employment structure                                           |               |          |             |            |                 |
| Sub-indicator                                                                                                                                                          | Life expectancy                                                |               |          |             |            |                 |
| Sub-indicator                                                                                                                                                          | Preservation of Cultural Identity                              |               |          |             |            |                 |
| Sub-indicator                                                                                                                                                          | General price index to the consumer                            |               |          |             |            |                 |
| Sub-indicator                                                                                                                                                          | Knowledge infrastructure                                       |               |          |             |            |                 |
| Sub-indicator                                                                                                                                                          | Population education                                           |               |          |             |            |                 |
| Sub-indicator                                                                                                                                                          | Income level                                                   |               |          |             |            |                 |
| Sub-indicator                                                                                                                                                          | Community Project                                              |               |          |             |            |                 |

|               |                                                  |  |  |  |  |  |
|---------------|--------------------------------------------------|--|--|--|--|--|
| Sub-indicator | The average salary of employed staff and workers |  |  |  |  |  |
| Sub-indicator | Overcrowding of families                         |  |  |  |  |  |
| Sub-indicator | Unemployment rate                                |  |  |  |  |  |
| Sub-indicator | Child mortality rate                             |  |  |  |  |  |
| Sub-indicator | Accident mortality rate                          |  |  |  |  |  |
| Sub-indicator | The natural population growth rate               |  |  |  |  |  |
| Sub-indicator | Urban vulnerability                              |  |  |  |  |  |
| Sub-indicator | Total Internet penetration                       |  |  |  |  |  |
| Sub-indicator | Municipal services assistance                    |  |  |  |  |  |
| Indicator     | Economic Indicator                               |  |  |  |  |  |
| Sub-indicator | Market attractiveness                            |  |  |  |  |  |
| Sub-indicator | Economic development                             |  |  |  |  |  |
| Sub-indicator | Gross Domestic Product (GDP)                     |  |  |  |  |  |
| Sub-indicator | Gini Index                                       |  |  |  |  |  |
| Sub-indicator | Business parks                                   |  |  |  |  |  |
| Sub-indicator | GDP per capita                                   |  |  |  |  |  |
| Sub-indicator | Contingent Plan                                  |  |  |  |  |  |

|               |                                                                                     |  |  |  |  |  |
|---------------|-------------------------------------------------------------------------------------|--|--|--|--|--|
| Sub-indicator | The proportion of primary industry                                                  |  |  |  |  |  |
| Sub-indicator | The proportion of secondary industry                                                |  |  |  |  |  |
| Sub-indicator | The proportion of tertiary industry                                                 |  |  |  |  |  |
| Sub-indicator | The proportion of expenses with science and technology                              |  |  |  |  |  |
| Sub-indicator | The proportion of education expenses                                                |  |  |  |  |  |
| Sub-indicator | The proportion between available annual urban family income and rural family income |  |  |  |  |  |
| Sub-indicator | Economic reserves                                                                   |  |  |  |  |  |
| Sub-indicator | Market size                                                                         |  |  |  |  |  |
| Sub-indicator | The regional revenue growth rate                                                    |  |  |  |  |  |
| Sub-indicator | GDP growth rate per capita                                                          |  |  |  |  |  |
| Sub-indicator | Export rate to GDP                                                                  |  |  |  |  |  |
| Sub-indicator | Foreign investment rate in relation to GDP                                          |  |  |  |  |  |
| Indicator     | Environmental Indicator                                                             |  |  |  |  |  |
| Sub-indicator | The proportion of investment in environmental protection in relation to GDP         |  |  |  |  |  |
| Sub-indicator | Per capita green area                                                               |  |  |  |  |  |
| Sub-indicator | The proportion of urban areas                                                       |  |  |  |  |  |
| Sub-indicator | Solid waste emissions                                                               |  |  |  |  |  |

|               |                                                                                                           |  |  |  |  |  |
|---------------|-----------------------------------------------------------------------------------------------------------|--|--|--|--|--|
| Sub-indicator | Total main pollutant emissions                                                                            |  |  |  |  |  |
| Sub-indicator | Ecological footprint                                                                                      |  |  |  |  |  |
| Sub-indicator | Proportion of treated consumer waste                                                                      |  |  |  |  |  |
| Sub-indicator | Quality of urban life                                                                                     |  |  |  |  |  |
| Sub-indicator | Soil quality                                                                                              |  |  |  |  |  |
| Sub-indicator | Preservation of biodiversity                                                                              |  |  |  |  |  |
| Sub-indicator | Green coverage ratio of built areas                                                                       |  |  |  |  |  |
| Sub-indicator | Forest coverage rate                                                                                      |  |  |  |  |  |
| Sub-indicator | Household waste treatment fee                                                                             |  |  |  |  |  |
| SDG 01        | I consider the eradication of poverty in my city an important activity.                                   |  |  |  |  |  |
| SDG 02        | I consider the use of sustainable agriculture and the eradication of poverty important factors for a city |  |  |  |  |  |
| SDG 03        | I consider the health and well-being of the population to be important factors for a city                 |  |  |  |  |  |
| SDG 04        | I consider quality education a key factor for a city                                                      |  |  |  |  |  |
| SDG 05        | I believe that gender equality should be considered in the actions of companies in my city                |  |  |  |  |  |
| SDG 06        | I believe that access to clean water and basic sanitation is fundamental for the inhabitants of a city    |  |  |  |  |  |
| SDG 07        | I believe that cities should have clean energy accessible to the population                               |  |  |  |  |  |
| SDG 08        | I believe that there should be decent work and economic growth                                            |  |  |  |  |  |
| SDG 09        | I believe that companies in my city should focus on innovation and infrastructure activities              |  |  |  |  |  |
| SDG 10        | I believe that the city should promote actions to reduce inequalities                                     |  |  |  |  |  |
| SDG 11        | I consider it relevant that the city is concerned with being sustainable                                  |  |  |  |  |  |

|           |                                                                                                                                            |  |  |  |  |  |
|-----------|--------------------------------------------------------------------------------------------------------------------------------------------|--|--|--|--|--|
| SDG<br>12 | I consider it appropriate that the companies' production be socio-environmentally responsible as well as the consumption of the population |  |  |  |  |  |
| SDG<br>13 | I consider it important for my city to combat global climate change                                                                        |  |  |  |  |  |
| SDG<br>14 | I consider it relevant that the city promote actions to preserve habitats in water (rivers, lakes, seas...)                                |  |  |  |  |  |
| SDG<br>15 | I consider it relevant that the city promote actions to preserve terrestrial habitats                                                      |  |  |  |  |  |
| SDG<br>16 | I consider peace, justice and effective institutions to be relevant to my city                                                             |  |  |  |  |  |
| SDG<br>17 | I believe that the city should promote partnerships with other institutions to implement sustainability projects                           |  |  |  |  |  |
